# Supplementary material
Source: PubMed Central journal article supplement (PMC5791064)
Supplement: ASN.2017070749SupplementaryData1.pdf [file ASN.2017070749SupplementaryData1.pdf]

## **SUPPLEMENTARY APPENDIX**

### **SUPPLEMENTARY TABLES AND FIGURES**

**Supplementary Table 1.** Multivariable dynamic antibody-mediated rejection prediction Cox model with change in peritubular Banff score after treatment coded as a categorical variable

**Supplementary Table 2.** Characteristics of the external validation cohort at the time of transplantation

**Supplementary Table 3.** Clinical, pathological and immunological characteristics of the external validation cohort at antibody-mediated rejection diagnosis and at the post-treatment evaluation

**Supplementary Table 4.** Net benefit for adding a new intervention in all kidney transplant recipients with antibody-mediated rejection or according to the antibody-mediated rejection prognostic score

**Supplementary Figure 1.** Flow diagram of the study population

**Supplementary Figure 2.** Improvement in the prediction of the risk of kidney allograft loss provided by the dynamic antibody-mediated rejection prediction model including the post-treatment evaluation compared with the prediction made at the time of antibody-mediated rejection diagnosis

**Supplementary Table 1. Multivariable dynamic antibody-mediated rejection prediction  
Cox model with change in peritubular Banff score after treatment coded as a categorical  
variable**

|                                                                                         | Number<br>of<br>patients | Number<br>of<br>events | HR   | 95%CI       | P      |
|-----------------------------------------------------------------------------------------|--------------------------|------------------------|------|-------------|--------|
| <b>eGFR at ABMR diagnosis</b> (per 1-mL/min/1.73 m <sup>2</sup> increment)              | 278                      | 60                     | 0.93 | [0.91-0.95] | <0.001 |
| <b>Interstitial fibrosis/Tubular atrophy at ABMR diagnosis</b>                          |                          |                        |      |             |        |
| <b>Banff score 0</b>                                                                    | 130                      | 16                     | 1    |             |        |
| <b>Banff score &gt;0</b>                                                                | 148                      | 44                     | 2.49 | [1.39-4.47] | 0.002  |
| <b>eGFR relative change after treatment</b> (log <sub>10</sub> [value+0.7], continuous) | 278                      | 60                     | 0.23 | [0.16-0.34] | <0.001 |
| <b>ΔPeritubular capillaritis Banff score after treatment</b>                            |                          |                        |      |             |        |
| <b>ΔBanff score &lt;0</b>                                                               | 158                      | 25                     | 1    |             |        |
| <b>ΔBanff score ≥0</b>                                                                  | 120                      | 35                     | 1.67 | [1.00-2.82] | 0.052  |
| <b>Anti-HLA DSA MFI relative change after treatment</b> (continuous)                    | 278                      | 60                     | 1.32 | [1.13-1.54] | <0.001 |

ABMR, antibody-mediated rejection; DSA, donor-specific antibody; HLA, human leucocyte antigen; MFI, mean fluorescence intensity

Relative change =  $\frac{\text{value after treatment} - \text{value at ABMR diagnosis}}{\text{value at ABMR diagnosis}}$

Δ = value after treatment – value at ABMR diagnosis

**Supplementary Table 2. Characteristics of the external validation cohort at the time of transplantation**

| <b>Recipient characteristics</b>                           |     | <b>N</b>   |
|------------------------------------------------------------|-----|------------|
| <b>Age</b> (years) - mean±SD                               | 202 | 47.6±14.6  |
| <b>Male gender</b> (male) - n (%)                          | 202 | 119 (58.9) |
| <b>Retransplantation</b> - n (%)                           | 202 | 34 (16.8)  |
| <b>Preemptive transplantation</b> - n (%)                  | 202 | 21 (10.4)  |
| <b>Time since dialysis</b> (years) - mean±SD               | 181 | 3.9±3.0    |
| <b>Blood type</b> - n (%)                                  | 202 |            |
| <b>A</b>                                                   |     | 83 (41.1)  |
| <b>B</b>                                                   |     | 28 (13.9)  |
| <b>O</b>                                                   |     | 85 (42.1)  |
| <b>AB</b>                                                  |     | 6 (3.0)    |
| <b>Chronic kidney disease</b> - n (%)                      | 202 |            |
| <b>Glomerulopathy</b>                                      |     | 60 (29.7)  |
| <b>Vascular nephropathy</b>                                |     | 17 (8.4)   |
| <b>Chronic interstitial nephropathy</b>                    |     | 22 (10.9)  |
| <b>Malformative uropathy</b>                               |     | 10 (5.0)   |
| <b>Polycystic kidney disease</b>                           |     | 12 (5.9)   |
| <b>Diabetes</b>                                            |     | 18 (8.9)   |
| <b>Other</b>                                               |     | 13 (6.4)   |
| <b>Not determined</b>                                      |     | 50 (24.8)  |
| <b>Donor characteristics</b>                               |     |            |
| <b>Age</b> (years) - mean±SD                               | 202 | 51.4±17.0  |
| <b>Male sex</b> - n (%)                                    | 202 | 107 (53.0) |
| <b>Type</b> - n (%)                                        | 202 |            |
| <b>Living</b>                                              |     | 32 (15.8)  |
| <b>Cerebrovascular death</b>                               |     | 64 (31.7)  |
| <b>Other cause of death</b>                                |     | 104 (52.5) |
| <b>Terminal serum creatinine</b> (μmol/L) - mean±SD        | 202 | 91.1±52.9  |
| <b>Transplant characteristics</b>                          |     |            |
| <b>Cold ischemia time</b> (hours) - mean±SD                | 202 | 15.8±9     |
| <b>HLA mismatch</b> - mean±SD                              | 202 |            |
| <b>A</b>                                                   |     | 1.1±0.7    |
| <b>B</b>                                                   |     | 1.1±0.7    |
| <b>DR</b>                                                  |     | 1.1±0.6    |
| <b>Anti-HLA DSA at the time of transplantation</b> - n (%) | 202 | 63 (31.2)  |

DSA, donor-specific antibody; HLA, human leukocyte antigen

**Supplementary Table 3. Clinical, pathological and immunological characteristics of the external validation cohort at antibody-mediated rejection diagnosis and at the post-treatment evaluation**

|                                                        | <b>N</b> | <b>ABMR diagnosis</b> | <b>Post-treatment</b> | <b>P</b> |
|--------------------------------------------------------|----------|-----------------------|-----------------------|----------|
| <b>Clinical characteristics</b>                        |          |                       |                       |          |
| <b>GFR</b> (mL/min/1.73 m <sup>2</sup> ) - mean±SD     | 202      | 35.4±18.9             | 41.3±18.9             | <0.001   |
| <b>Proteinuria</b> (g/g) - mean±SD                     | 202      | 0.87±1.19             | 0.78±1.40             | 0.02     |
| <b>Histological characteristics (Banff scores)</b>     |          |                       |                       |          |
| <b>Glomerulitis</b> - mean±SD                          | 201      | 1.9±0.9               | 1.2±1.0               | <0.001   |
| <b>Peritubular capillaritis</b> - mean±SD              | 201      | 2.0±0.8               | 1.2±1.0               | <0.001   |
| <b>Interstitial inflammation</b> - mean±SD             | 201      | 0.6±1.0               | 0.3±0.6               | <0.001   |
| <b>Tubulitis</b> - mean±SD                             | 201      | 0.7±1.0               | 0.4±0.8               | <0.001   |
| <b>Endarteritis</b> - mean±SD                          | 196      | 0.4±0.8               | 0.1±0.4               | <0.001   |
| <b>Chronic allograft glomerulopathy</b> - mean±SD      | 201      | 0.3±0.8               | 0.4±0.9               | 0.006    |
| <b>Interstitial fibrosis/tubular atrophy</b> - mean±SD | 201      | 1.0±1.1               | 1.4±1.1               | <0.001   |
| <b>Arteriosclerosis</b> - mean±SD                      | 196      | 1.2±1.0               | 1.4±1.0               | 0.008    |
| <b>C4d deposition</b> - n (%)                          | 201      | 119 (59.2)            | 77 (38.3)             | <0.001   |
| <b>Immunodominant anti-HLA DSA characteristics</b>     |          |                       |                       |          |
| <b>MFI</b> - mean±SE                                   | 201      | 4934.1±355.8          | 2812.8±324.0          | <0.001   |

ABMR, antibody-mediated rejection; DSA, donor-specific antibody; HLA, human leucocyte antigen; GFR, glomerular filtration rate; MFI, mean fluorescence intensity

**Supplementary Table 4. Net benefit for adding a new intervention in all kidney transplant recipients with antibody-mediated rejection or according to the antibody-mediated rejection prognostic score**

The clinical decision considered here is to add a new intervention to the standard treatment of antibody-mediated rejection. The net benefit for adding a new intervention in all patients with antibody-mediated rejection or according to the antibody-mediated rejection prognostic score is provided for different decision risk thresholds for 6-year allograft loss. The reduction in avoidable interventions per 100 antibody-mediated rejection patients is net of false negatives; i.e., without a decrease in the number of high-risk patients who duly undergo the intervention.

| Risk threshold for decision making<br>(6-year allograft loss) | Net benefit         |                       | Reduction in avoidable interventions per 100 ABMR patients |
|---------------------------------------------------------------|---------------------|-----------------------|------------------------------------------------------------|
|                                                               | Intervention in all | ABMR prognostic score |                                                            |
| 1%                                                            | 0.208               | 0.209                 | 10                                                         |
| 10%                                                           | 0.129               | 0.146                 | 15                                                         |
| 20%                                                           | 0.020               | 0.110                 | 36                                                         |
| 30%                                                           | -0.120              | 0.082                 | 51                                                         |
| 40%                                                           | -0.307              | 0.060                 | 55                                                         |
| 50%                                                           | -0.568              | 0.058                 | 63                                                         |
| 60%                                                           | -0.960              | 0.049                 | 67                                                         |
| 70%                                                           | -1.614              | 0.054                 | 71                                                         |
| 80%                                                           | -2.921              | 0.04                  | 74                                                         |
| 90%                                                           | -6.842              | 0.011                 | 76                                                         |
| 99%                                                           | -77.420             | 0                     | 78                                                         |

ABMR, antibody-mediated rejection

$$\text{Net benefit} = \frac{\text{True Positive Count}}{n} - \frac{\text{False Positive Count}}{n} \left( \frac{p}{1-p} \right)$$

### Supplementary Figure 1. Flow diagram of the study population

ABMR, antibody-mediated rejection; DSA, donor-specific antibody; GFR, glomerular filtration rate; HLA, human leucocyte antigen; IVIG, intravenous immune globulin; PE, plasma exchange; SOC, standard of care

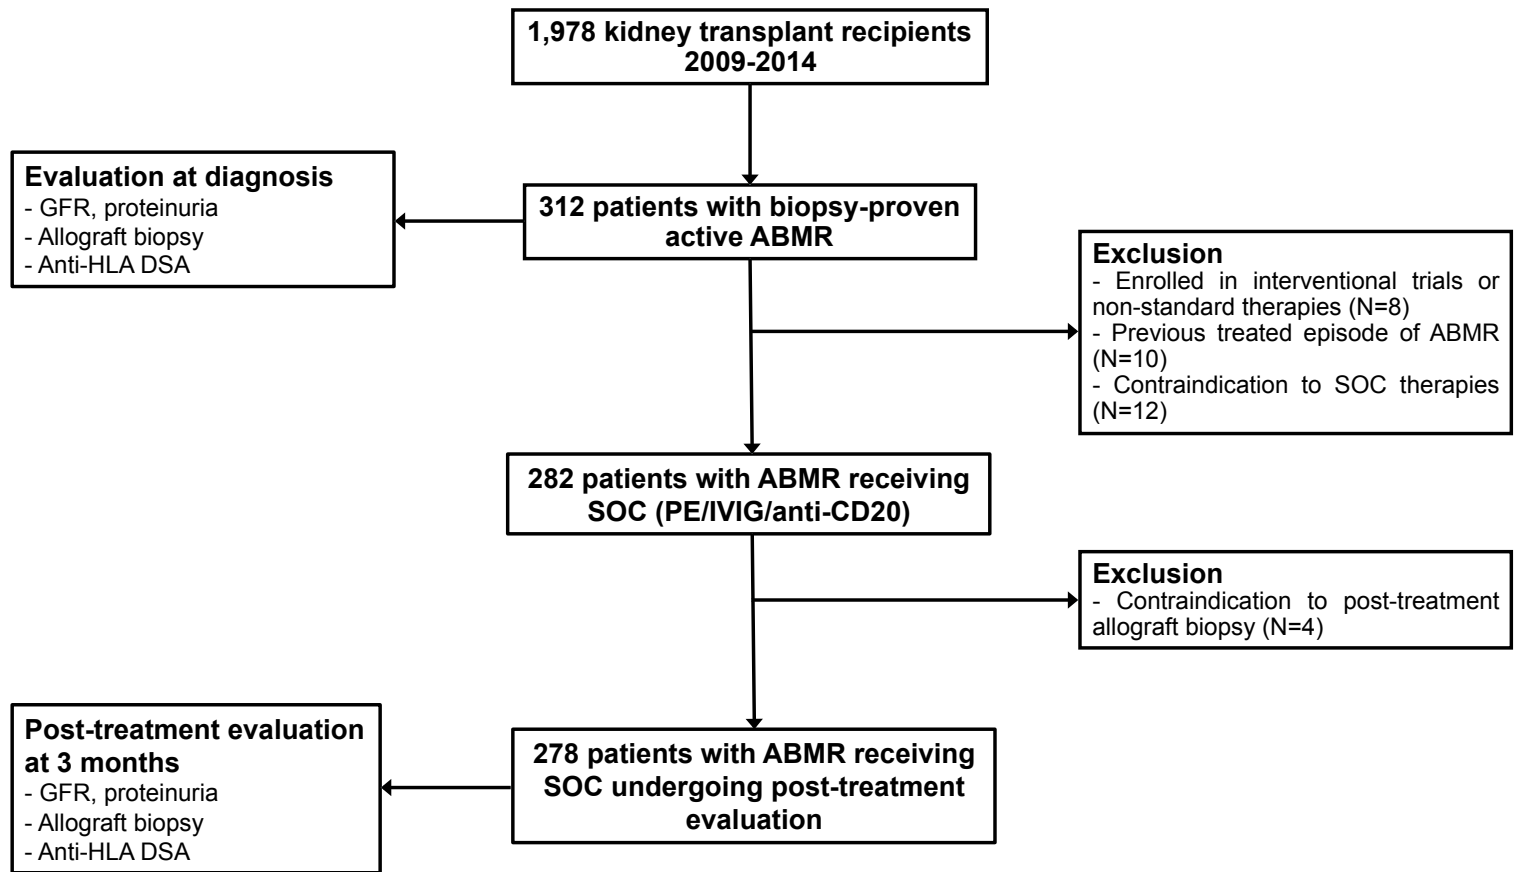

**Supplementary Figure 2. Improvement in the prediction of the risk of kidney allograft loss provided by the dynamic antibody-mediated rejection prediction model including the post-treatment evaluation compared with the prediction made at the time of antibody-mediated rejection diagnosis**

The multivariable model for kidney allograft loss defined at the diagnosis of antibody-mediated rejection included glomerular filtration rate, presence of chronic allograft glomerulopathy, presence of interstitial fibrosis and tubular atrophy, and anti-HLA DSA *de novo* status. The multivariable dynamic antibody-mediated rejection prediction model for kidney allograft loss included glomerular filtration rate at diagnosis, presence of interstitial fibrosis and tubular atrophy at diagnosis, change in glomerular filtration rate after treatment, change in peritubular capillaritis Banff score after treatment and change in immunodominant donor-specific anti-HLA antibody mean fluorescence intensity after treatment.

ABMR, antibody-mediated rejection

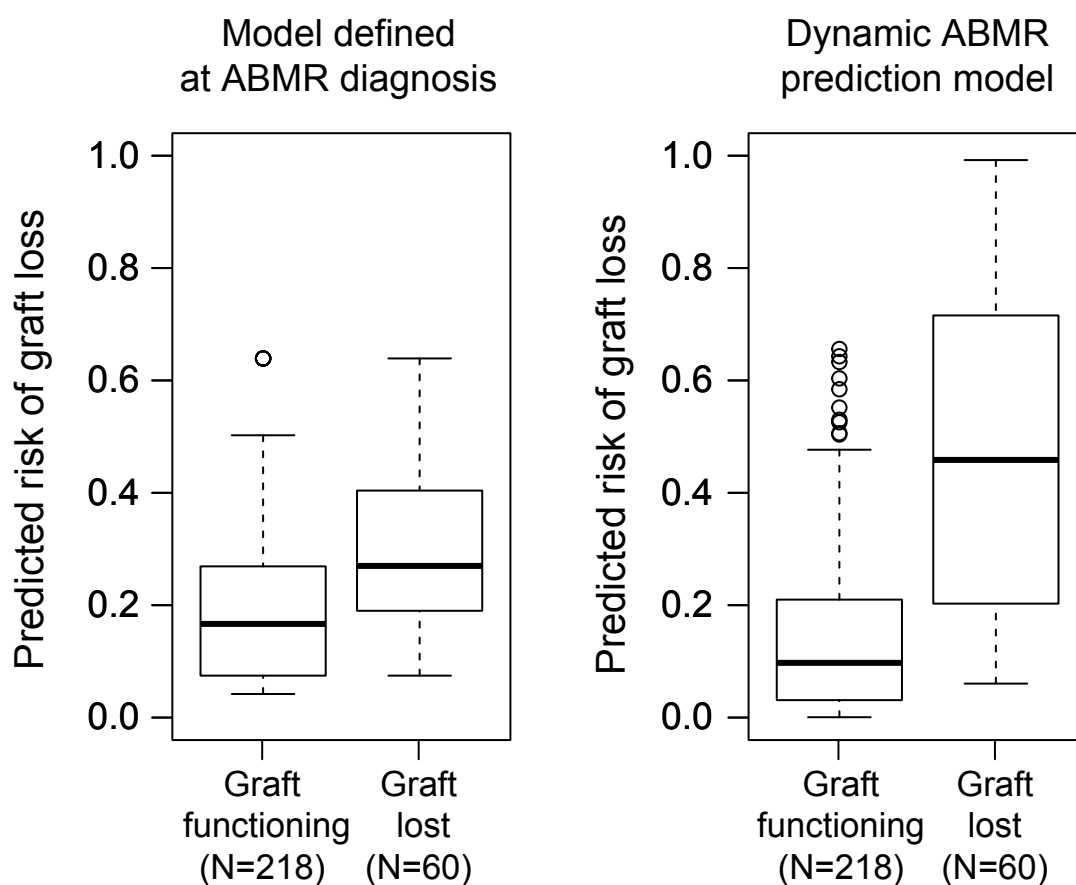

## SUPPLEMENTARY METHODS

### Equation of the prognostic score for kidney allograft survival in patients with antibody-mediated rejection

eGFR, estimated glomerular filtration rate; MFI, mean fluorescence intensity of the immunodominant donor-specific anti-HLA antibody

Prognostic score

$$\begin{aligned} &= 0.0765323 \times \text{eGFR}_{\text{diagnosis}} \\ &+ 0.8913344 \times \text{Interstitial fibrosis and tubular atrophy}_{\text{diagnosis}} \binom{0}{1} \\ &- 1.440734 \times \ln \left( \frac{\text{eGFR}_{\text{post-treatment}} - \text{eGFR}_{\text{diagnosis}}}{\text{eGFR}_{\text{diagnosis}}} + 0.7 \right) \\ &+ 0.4034607 \times (\text{ptc Banff score}_{\text{post-treatment}} - \text{ptc Banff score}_{\text{diagnosis}}) \\ &+ 0.2608125 \times \left( \frac{\text{MFI}_{\text{post-treatment}} - \text{MFI}_{\text{diagnosis}}}{\text{MFI}_{\text{diagnosis}}} \right) \end{aligned}$$
